# Supplementary material
Source: PubMed Central journal article supplement (PMC4080604)
Supplement: 10.4085_1062-6050-49.1.12.S1.pdf [file 10.4085_1062-6050-49.1.12.S1.pdf]

| History Themes                          |                                      | Tasks |   |     |   |   |
|-----------------------------------------|--------------------------------------|-------|---|-----|---|---|
| Nature of Injury                        | Chief Complaint                      | 0     | 1 | n/a |   |   |
|                                         | Date of Injury/When Did Injury Occur | 0     | 1 | n/a |   |   |
|                                         | MOI/Recreation of MOI                | 0     | 1 | n/a |   |   |
|                                         | Previous Injury to this Site         | 0     | 1 | n/a |   |   |
|                                         | Previous Injury to joint above/below | 0     | 1 | n/a |   |   |
|                                         | Functional Limitations               | 0     | 1 | n/a |   |   |
|                                         | History Back or Neck Injury/Pain     | 0     | 1 | n/a |   |   |
|                                         | Subjective/patient SHARP             | 0     | 1 | n/a |   |   |
|                                         | Unusual Sounds/Sensations            | 0     | 1 | n/a |   |   |
|                                         | Nature of Injury Global Rating Scale | 0     | 1 | 2   | 3 | 4 |
| Patient Information                     | Age                                  | 0     | 1 | n/a |   |   |
|                                         | Primary Sport/occupation             | 0     | 1 | n/a |   |   |
|                                         | Level of Sport                       | 0     | 1 | n/a |   |   |
|                                         | Training for Sport                   | 0     | 1 | n/a |   |   |
|                                         | Weight Training for Sport/occupation | 0     | 1 | n/a |   |   |
|                                         | Change in anthropometrics            | 0     | 1 | n/a |   |   |
|                                         | Psycho/Emotional Stress              | 0     | 1 | n/a |   |   |
|                                         | Training Surface                     | 0     | 1 | n/a |   |   |
|                                         | Equipment or Footwear                | 0     | 1 | n/a |   |   |
|                                         | Activities of Daily Living           | 0     | 1 | n/a |   |   |
|                                         | Other Sports/Activities              | 0     | 1 | n/a |   |   |
| Patient Information Global Rating Scale | 0                                    | 1     | 2 | 3   | 4 | 5 |

|                                           |                                                        |   |   |     |   |   |   |  |
|-------------------------------------------|--------------------------------------------------------|---|---|-----|---|---|---|--|
| Global Pain Questions                     | Pain: Pain Location                                    | 0 | 1 | n/a |   |   |   |  |
|                                           | Pain: Describe Pain                                    | 0 | 1 | n/a |   |   |   |  |
|                                           | Pain: Pain Scale                                       | 0 | 1 | n/a |   |   |   |  |
|                                           | Pain: Relieves Pain                                    | 0 | 1 | n/a |   |   |   |  |
|                                           | Pain: Exacerbates Pain                                 | 0 | 1 | n/a |   |   |   |  |
|                                           | Pain: Morning or night Pain                            | 0 | 1 | n/a |   |   |   |  |
|                                           | Pain: Pain before, during or after activity            | 0 | 1 | n/a |   |   |   |  |
|                                           | Pain: Radiating Pain Proximal or Distal                | 0 | 1 | n/a |   |   |   |  |
|                                           | Pain: Increase with coughing, sneezing or bearing-down | 0 | 1 | n/a |   |   |   |  |
|                                           | Pain: Sleeping and Position                            | 0 | 1 | n/a |   |   |   |  |
| Global Pain Questions Global Rating Scale |                                                        | 0 | 1 | 2   | 3 | 4 | 5 |  |

|                                      |                           |   |     |     |  |  |  |  |
|--------------------------------------|---------------------------|---|-----|-----|--|--|--|--|
| Safety/Rehab/Understanding           | Treatment                 | 0 | 1   | n/a |  |  |  |  |
|                                      | Reviewed by Physician     | 0 | 1   | n/a |  |  |  |  |
|                                      | X-rays/diagnostic imaging | 0 | 1   | n/a |  |  |  |  |
|                                      | Medications               | 0 | 1   | n/a |  |  |  |  |
|                                      | Allergies                 | 0 | 1   | n/a |  |  |  |  |
|                                      | Goals for RETURN          | 0 | 1   | n/a |  |  |  |  |
|                                      | Overall Health            | 0 | 1   | n/a |  |  |  |  |
|                                      | Medical Conditions        | 0 | 1   | n/a |  |  |  |  |
| Family History of Medical Conditions | 0                         | 1 | n/a |     |  |  |  |  |

|                                                |  |   |   |   |   |   |   |  |
|------------------------------------------------|--|---|---|---|---|---|---|--|
| Safety/Rehab/Understanding Global Rating Scale |  | 0 | 1 | 2 | 3 | 4 | 5 |  |
|------------------------------------------------|--|---|---|---|---|---|---|--|

|                                                                                                                                      |  |   |   |  |  |  |  |  |
|--------------------------------------------------------------------------------------------------------------------------------------|--|---|---|--|--|--|--|--|
| Did the student employ differential diagnosis strategy(ies) in the history to identify/eliminate other possible injuries/conditions? |  | 0 | 1 |  |  |  |  |  |
| Did the student list at least <b>three</b> potential anatomical structures/injuries as an <b>index of suspicion</b> ?                |  | 0 | 1 |  |  |  |  |  |
| Did the student <b>hone</b> into their <b>index of suspicion</b> in their history?                                                   |  | 0 | 1 |  |  |  |  |  |

|                                     |  |   |   |   |   |   |   |  |
|-------------------------------------|--|---|---|---|---|---|---|--|
| Overall History Global Rating Scale |  | 0 | 1 | 2 | 3 | 4 | 5 |  |
|-------------------------------------|--|---|---|---|---|---|---|--|

| Observation                                                                                                                              |   |   |     |   |   |   |  |  |  |
|------------------------------------------------------------------------------------------------------------------------------------------|---|---|-----|---|---|---|--|--|--|
| Swelling                                                                                                                                 | 0 | 1 | n/a |   |   |   |  |  |  |
| Heat                                                                                                                                     | 0 | 1 | n/a |   |   |   |  |  |  |
| Altered Function                                                                                                                         | 0 | 1 | n/a |   |   |   |  |  |  |
| Redness                                                                                                                                  | 0 | 1 | n/a |   |   |   |  |  |  |
| Discoloration                                                                                                                            | 0 | 1 | n/a |   |   |   |  |  |  |
| Lower Extremity:                                                                                                                         |   |   |     |   |   |   |  |  |  |
| Pelvic Height                                                                                                                            | 0 | 1 | n/a |   |   |   |  |  |  |
| ASIS                                                                                                                                     | 0 | 1 | n/a |   |   |   |  |  |  |
| PSIS                                                                                                                                     | 0 | 1 | n/a |   |   |   |  |  |  |
| Medial Malleoli                                                                                                                          | 0 | 1 | n/a |   |   |   |  |  |  |
| Patellae                                                                                                                                 | 0 | 1 | n/a |   |   |   |  |  |  |
| Genu Valgum/Varum                                                                                                                        | 0 | 1 | n/a |   |   |   |  |  |  |
| Tibial Valgum/Varum                                                                                                                      | 0 | 1 | n/a |   |   |   |  |  |  |
| Foot - Static                                                                                                                            | 0 | 1 | n/a |   |   |   |  |  |  |
| Foot - Dynamic (Gait)                                                                                                                    | 0 | 1 | n/a |   |   |   |  |  |  |
| Symmetry                                                                                                                                 |   |   |     |   |   |   |  |  |  |
| Foot rotation/position                                                                                                                   | 0 | 1 | n/a |   |   |   |  |  |  |
| Posture                                                                                                                                  |   |   |     |   |   |   |  |  |  |
| Observes from side/side                                                                                                                  | 0 | 1 | n/a |   |   |   |  |  |  |
| Observes from rear/front                                                                                                                 | 0 | 1 | n/a |   |   |   |  |  |  |
| Observes Pelvic Position/Tilt                                                                                                            | 0 | 1 | n/a |   |   |   |  |  |  |
| Scars, cuts, abrasions                                                                                                                   | 0 | 1 | n/a |   |   |   |  |  |  |
| Other                                                                                                                                    | 0 | 1 | n/a |   |   |   |  |  |  |
| Other                                                                                                                                    | 0 | 1 | n/a |   |   |   |  |  |  |
| Did the student employ differential diagnosis strategy(ies) in the observation to identify/eliminate other possible injuries/conditions? | 0 | 1 |     |   |   |   |  |  |  |
| Did the student specifically <b>OBSERVE</b> for their <b>index of suspicion</b> identified after the history?                            | 0 | 1 |     |   |   |   |  |  |  |
| Overall Observation Global Rating Scale                                                                                                  | 0 | 1 | 2   | 3 | 4 | 5 |  |  |  |

### Clearing Joints Above and Below

|                                                                                                                                 |   |   |     |
|---------------------------------------------------------------------------------------------------------------------------------|---|---|-----|
| Did the student clear the joint <b>below</b> the lesion site?                                                                   | 0 | 1 | n/a |
| Did the student clear the joint <b>above</b> the lesion site?                                                                   | 0 | 1 | n/a |
| Did the student <b>change their index of suspicion</b> appropriately after clearing the joints above and below the lesion site? | 0 | 1 |     |

### Scanning Exams

|                                                                                                                                             |   |   |     |
|---------------------------------------------------------------------------------------------------------------------------------------------|---|---|-----|
| Did the student ask inquire about <b>radicular pain</b> in the history?                                                                     | 0 | 1 | n/a |
| Did the student clearly determine a mechanism of injury in the history? Did they establish the MOI was <b>traumatic and not insidious</b> ? | 0 | 1 | n/a |
| Did the student perform <b>active ROM</b> in the <b>lower back</b> ?                                                                        | 0 | 1 | n/a |
| Did the student <b>change their index of suspicion</b> appropriately after completing the <b>scanning exam</b> ?                            | 0 | 1 |     |

### Active ROM

|                                                                                                          |   |   |   |   |   |   |     |
|----------------------------------------------------------------------------------------------------------|---|---|---|---|---|---|-----|
| Flexion                                                                                                  | 0 | 1 | 2 | 3 | 4 | 5 | n/a |
| Extension                                                                                                | 0 | 1 | 2 | 3 | 4 | 5 | n/a |
| Adduction                                                                                                | 0 | 1 | 2 | 3 | 4 | 5 | n/a |
| Abduction                                                                                                | 0 | 1 | 2 | 3 | 4 | 5 | n/a |
| External Rotation                                                                                        | 0 | 1 | 2 | 3 | 4 | 5 | n/a |
| Internal Rotation                                                                                        | 0 | 1 | 2 | 3 | 4 | 5 | n/a |
| Did the student specifically test structures that were identified in their previous index of suspicions? | 0 | 1 |   |   |   |   |     |
| Did the student <b>change their index of suspicion</b> appropriately after completing <b>AROM</b> ?      | 0 | 1 |   |   |   |   |     |
| Overall Active Range of Motion Global Rating Scale                                                       | 0 | 1 | 2 | 3 | 4 | 5 |     |

| <b>Passive ROM</b>                                                                                       |   |   |   |   |   |   |     |  |
|----------------------------------------------------------------------------------------------------------|---|---|---|---|---|---|-----|--|
| Flexion                                                                                                  | 0 | 1 | 2 | 3 | 4 | 5 | n/a |  |
| Extension                                                                                                | 0 | 1 | 2 | 3 | 4 | 5 | n/a |  |
| Adduction                                                                                                | 0 | 1 | 2 | 3 | 4 | 5 | n/a |  |
| Abduction                                                                                                | 0 | 1 | 2 | 3 | 4 | 5 | n/a |  |
| External Rotation                                                                                        | 0 | 1 | 2 | 3 | 4 | 5 | n/a |  |
| Internal Rotation                                                                                        | 0 | 1 | 2 | 3 | 4 | 5 | n/a |  |
| Did the student specifically test structures that were identified in their previous index of suspicions? | 0 | 1 |   |   |   |   |     |  |
| Did the student <b>change their index of suspicion</b> appropriately after completing <b>PROM</b> ?      | 0 | 1 |   |   |   |   |     |  |
| Overall Passive Range of Motion Global Rating Scale                                                      | 0 | 1 | 2 | 3 | 4 | 5 |     |  |

| <b>Isometric Resisted</b>                                                                                |   |   |   |   |   |   |     |  |
|----------------------------------------------------------------------------------------------------------|---|---|---|---|---|---|-----|--|
| Flexion                                                                                                  | 0 | 1 | 2 | 3 | 4 | 5 | n/a |  |
| Extension                                                                                                | 0 | 1 | 2 | 3 | 4 | 5 | n/a |  |
| Adduction                                                                                                | 0 | 1 | 2 | 3 | 4 | 5 | n/a |  |
| Abduction                                                                                                | 0 | 1 | 2 | 3 | 4 | 5 | n/a |  |
| External Rotation                                                                                        | 0 | 1 | 2 | 3 | 4 | 5 | n/a |  |
| Internal Rotation                                                                                        | 0 | 1 | 2 | 3 | 4 | 5 | n/a |  |
| Plantarflexion                                                                                           | 0 | 1 | 2 | 3 | 4 | 5 | n/a |  |
| Did the student specifically test structures that were identified in their previous index of suspicions? | 0 | 1 |   |   |   |   |     |  |
| Did the student <b>change their index of suspicion</b> appropriately after completing <b>IR</b> ?        | 0 | 1 |   |   |   |   |     |  |
| Overall Isometric Resisted Testing Global Rating Scale                                                   | 0 | 1 | 2 | 3 | 4 | 5 |     |  |

| Special Tests                                                                                                                                                                                     |   |   |   |   |   |   |     |  |
|---------------------------------------------------------------------------------------------------------------------------------------------------------------------------------------------------|---|---|---|---|---|---|-----|--|
| Anterior drawer                                                                                                                                                                                   | 0 | 1 | 2 | 3 | 4 | 5 | n/a |  |
| Apley's distraction / compression                                                                                                                                                                 | 0 | 1 | 2 | 3 | 4 | 5 | n/a |  |
| Brush/sweep test                                                                                                                                                                                  | 0 | 1 | 2 | 3 | 4 | 5 | n/a |  |
| Clarke's sign                                                                                                                                                                                     | 0 | 1 | 2 | 3 | 4 | 5 | n/a |  |
| Dermatomes                                                                                                                                                                                        | 0 | 1 | 2 | 3 | 4 | 5 | n/a |  |
| Ely's                                                                                                                                                                                             | 0 | 1 | 2 | 3 | 4 | 5 | n/a |  |
| Jerk test of hughston                                                                                                                                                                             | 0 | 1 | 2 | 3 | 4 | 5 | n/a |  |
| Kendall                                                                                                                                                                                           | 0 | 1 | 2 | 3 | 4 | 5 | n/a |  |
| Lachman's                                                                                                                                                                                         | 0 | 1 | 2 | 3 | 4 | 5 | n/a |  |
| McMurray's                                                                                                                                                                                        | 0 | 1 | 2 | 3 | 4 | 5 | n/a |  |
| Myotomes                                                                                                                                                                                          | 0 | 1 | 2 | 3 | 4 | 5 | n/a |  |
| Obers                                                                                                                                                                                             | 0 | 1 | 2 | 3 | 4 | 5 | n/a |  |
| Patellar Apprehension                                                                                                                                                                             | 0 | 1 | 2 | 3 | 4 | 5 | n/a |  |
| Pivot Shift                                                                                                                                                                                       | 0 | 1 | 2 | 3 | 4 | 5 | n/a |  |
| Posterior drawer                                                                                                                                                                                  | 0 | 1 | 2 | 3 | 4 | 5 | n/a |  |
| Posterior sag                                                                                                                                                                                     | 0 | 1 | 2 | 3 | 4 | 5 | n/a |  |
| Reflexes                                                                                                                                                                                          | 0 | 1 | 2 | 3 | 4 | 5 | n/a |  |
| Slocum                                                                                                                                                                                            | 0 | 1 | 2 | 3 | 4 | 5 | n/a |  |
| Straight leg raise                                                                                                                                                                                | 0 | 1 | 2 | 3 | 4 | 5 | n/a |  |
| Superior Tib-Fib Jt. Play                                                                                                                                                                         | 0 | 1 | 2 | 3 | 4 | 5 | n/a |  |
| Thomas                                                                                                                                                                                            | 0 | 1 | 2 | 3 | 4 | 5 | n/a |  |
| Valgus stress                                                                                                                                                                                     | 0 | 1 | 2 | 3 | 4 | 5 | n/a |  |
| Varus stress                                                                                                                                                                                      | 0 | 1 | 2 | 3 | 4 | 5 | n/a |  |
| other                                                                                                                                                                                             | 0 | 1 | 2 | 3 | 4 | 5 | n/a |  |
| other                                                                                                                                                                                             | 0 | 1 | 2 | 3 | 4 | 5 | n/a |  |
| other                                                                                                                                                                                             | 0 | 1 | 2 | 3 | 4 | 5 | n/a |  |
| other                                                                                                                                                                                             | 0 | 1 | 2 | 3 | 4 | 5 | n/a |  |
| Did the student specifically test structures that were identified in their previous index of suspicions?                                                                                          | 0 | 1 |   |   |   |   |     |  |
| Did the student <b>change their index of suspicion</b> appropriately after completing special tests?                                                                                              | 0 | 1 |   |   |   |   |     |  |
| Did the student identify and complete <b>special tests</b> that permitted them to clearly <b>eliminate</b> structures that MAY be involved (i.e.; employ a differential diagnosis strategy(ies))? | 0 | 1 |   |   |   |   |     |  |

|                                                                                                                                                                                                             |   |   |   |   |   |   |  |  |
|-------------------------------------------------------------------------------------------------------------------------------------------------------------------------------------------------------------|---|---|---|---|---|---|--|--|
| Did the student identify and complete <b>special tests</b> that permitted them to clearly <b>identify</b> structures that MAY be involved/lesion site(i.e.; employ a differential diagnosis strategy(ies))? | 0 | 1 |   |   |   |   |  |  |
| Overall Special Testing Global Rating Scale                                                                                                                                                                 | 0 | 1 | 2 | 3 | 4 | 5 |  |  |

| <b>Palpation</b>                                 |   |   |   |   |   |   |     |  |
|--------------------------------------------------|---|---|---|---|---|---|-----|--|
| Adductor tubercle                                | 0 | 1 | 2 | 3 | 4 | 5 | n/a |  |
| Anterior Superior Iliac Spine                    | 0 | 1 | 2 | 3 | 4 | 5 | n/a |  |
| Biceps femoris and lateral gastrocnemius tendons | 0 | 1 | 2 | 3 | 4 | 5 | n/a |  |
| Fat pad                                          | 0 | 1 | 2 | 3 | 4 | 5 | n/a |  |
| Fibular head                                     | 0 | 1 | 2 | 3 | 4 | 5 | n/a |  |
| Gastrocnemius muscle bellies                     | 0 | 1 | 2 | 3 | 4 | 5 | n/a |  |
| Gerdy's tubercle/IT Band Insertion               | 0 | 1 | 2 | 3 | 4 | 5 | n/a |  |
| Hamstring muscle bellies                         | 0 | 1 | 2 | 3 | 4 | 5 | n/a |  |
| Iliotibial band                                  | 0 | 1 | 2 | 3 | 4 | 5 | n/a |  |
| Infrapatellar tendon                             | 0 | 1 | 2 | 3 | 4 | 5 | n/a |  |
| Joint Play                                       | 0 | 1 | 2 | 3 | 4 | 5 | n/a |  |
| Lateral femoral condyle and epicondyle           | 0 | 1 | 2 | 3 | 4 | 5 | n/a |  |
| Lateral joint line                               | 0 | 1 | 2 | 3 | 4 | 5 | n/a |  |
| LCL                                              | 0 | 1 | 2 | 3 | 4 | 5 | n/a |  |
| MCL                                              | 0 | 1 | 2 | 3 | 4 | 5 | n/a |  |
| Medial femoral condyle and epicondyle            | 0 | 1 | 2 | 3 | 4 | 5 | n/a |  |
| Medial hamstring and gastrocnemius               | 0 | 1 | 2 | 3 | 4 | 5 | n/a |  |
| Medial joint line                                | 0 | 1 | 2 | 3 | 4 | 5 | n/a |  |
| Patella                                          | 0 | 1 | 2 | 3 | 4 | 5 | n/a |  |
| Patellar retinaculum                             | 0 | 1 | 2 | 3 | 4 | 5 | n/a |  |
| Pes anserine insertion                           | 0 | 1 | 2 | 3 | 4 | 5 | n/a |  |
| Plica                                            | 0 | 1 | 2 | 3 | 4 | 5 | n/a |  |
| Popliteal fossa                                  | 0 | 1 | 2 | 3 | 4 | 5 | n/a |  |
| Quadriceps (whole)                               | 0 | 1 | 2 | 3 | 4 | 5 | n/a |  |
| Quadriceps (each individually)                   | 0 | 1 | 2 | 3 | 4 | 5 | n/a |  |
| Sartorius                                        | 0 | 1 | 2 | 3 | 4 | 5 | n/a |  |
| Superficial bursa                                | 0 | 1 | 2 | 3 | 4 | 5 | n/a |  |
| Suprapatellar pouch                              | 0 | 1 | 2 | 3 | 4 | 5 | n/a |  |

|                                                                                                                                                                                                                    |   |   |   |   |   |   |     |  |
|--------------------------------------------------------------------------------------------------------------------------------------------------------------------------------------------------------------------|---|---|---|---|---|---|-----|--|
| Suprapatellar tendon                                                                                                                                                                                               | 0 | 1 | 2 | 3 | 4 | 5 | n/a |  |
| Tibial plateau                                                                                                                                                                                                     | 0 | 1 | 2 | 3 | 4 | 5 | n/a |  |
| Tibial tuberosity                                                                                                                                                                                                  | 0 | 1 | 2 | 3 | 4 | 5 | n/a |  |
| other                                                                                                                                                                                                              | 0 | 1 | 2 | 3 | 4 | 5 | n/a |  |
| other                                                                                                                                                                                                              | 0 | 1 | 2 | 3 | 4 | 5 | n/a |  |
| other                                                                                                                                                                                                              | 0 | 1 | 2 | 3 | 4 | 5 | n/a |  |
| other                                                                                                                                                                                                              | 0 | 1 | 2 | 3 | 4 | 5 | n/a |  |
| other                                                                                                                                                                                                              | 0 | 1 | 2 | 3 | 4 | 5 | n/a |  |
| other                                                                                                                                                                                                              | 0 | 1 | 2 | 3 | 4 | 5 | n/a |  |
| Did the student specifically test structures that were identified in their previous index of suspicions?                                                                                                           | 0 | 1 |   |   |   |   |     |  |
| Did the student <b>change their index of suspicion</b> appropriately after completing palpations?                                                                                                                  | 0 | 1 |   |   |   |   |     |  |
| Did the student identify and <b>palpate</b> anatomical structures that permitted them to clearly <b>eliminate</b> structures that MAY be involved (i.e.; employ a differential diagnosis strategy(ies))?           | 0 | 1 |   |   |   |   |     |  |
| Did the student identify and <b>palpate</b> anatomical structures that permitted them to clearly <b>identify</b> structures that MAY be involved/lesion site(i.e.; employ a differential diagnosis strategy(ies))? | 0 | 1 |   |   |   |   |     |  |
| <b>Overall Palpation Global Rating Scale</b>                                                                                                                                                                       | 0 | 1 | 2 | 3 | 4 | 5 |     |  |

SOAT - Knee



| <b>Conclusion</b>                                                                                                                                                         |   |   |   |   |   |   |  |  |  |  |
|---------------------------------------------------------------------------------------------------------------------------------------------------------------------------|---|---|---|---|---|---|--|--|--|--|
| Is the conclusion/diagnosis correct?                                                                                                                                      | 0 | 1 | 2 | 3 | 4 | 5 |  |  |  |  |
| Did the student follow the correct (ie. thorough and accurate) <b>PROCESS</b> even though they may or may not have come up with the <u>correct</u> conclusion/diagnosis)? | 0 | 1 |   |   |   |   |  |  |  |  |
| Did the student refer to a physician for a complete diagnosis?                                                                                                            | 0 | 1 |   |   |   |   |  |  |  |  |

| <b>Overall Impression of the Student's/Examinee's Assessment Skills</b>                       |   |   |   |   |   |   |  |  |  |  |
|-----------------------------------------------------------------------------------------------|---|---|---|---|---|---|--|--|--|--|
| If you had to provide an overall grade out of 5, what would you give to the student/examinee? |   |   |   |   |   |   |  |  |  |  |
|                                                                                               | 0 | 1 | 2 | 3 | 4 | 5 |  |  |  |  |
